# Supplementary material
Source: publisher site journal article supplement (https://www.dovepress.com/article/593166)
Supplement: Supplementary file 1 [file 593166%20Revised%20Supplementary%20Material.doc]

**Supplementary Material：Semi-structured Interview Guide**

**1.Motivational Drivers and Reinforcement**

What motivates you to engage in exercise after surgery? What kinds of feedback or encouragement would help you maintain exercise over time (e.g., verbal encouragement, progress tracking, rewards)? How do these influence your willingness to continue?

**2.Personal Goals and Expected Outcomes**

What goals or outcomes do you hope to achieve through exercise (e.g., improving arm mobility, reducing fatigue, weight management, emotional well-being, returning to daily life or work)? How do these expectations influence your engagement in exercise?

**3.Perceived Physical Capability**

How has your physical condition after surgery affected your ability to exercise (e.g., upper limb limitation, pain, fatigue, balance, cardiopulmonary endurance)? Have these limitations changed across different stages of recovery (e.g., immediately after discharge, during adjuvant therapy, after treatment completion)?

**4.Knowledge and Skills for Exercise**

Do you feel you have sufficient knowledge about what types of exercise are appropriate or should be avoided at your current stage? Where do you obtain this information? How easy or difficult is it for you to learn and perform these exercises correctly?

**5.Cues and Reminders for Action**

What kinds of reminders or prompts help you initiate or maintain exercise (e.g., mobile apps, family reminders, scheduled routines)? Which forms do you prefer? What frequency or timing works best for you?

**6.Habit Formation and Integration into Daily Life**

Have you developed a routine of incorporating exercise into your daily life? If yes, how was this habit formed? If not, what do you think would help you turn exercise into a regular habit?
